# Supplementary figures and images for: Evaluating the Use of Machine Learning to Predict Expert-Driven Pareto-Navigated Calibrations for Personalised Automated Radiotherapy Planning
Source: MDPI journal article supplement (doi:10.3390/app13074548), 2023-04-03

# Supplementary File

## S1: Distribution of relative weighting factors

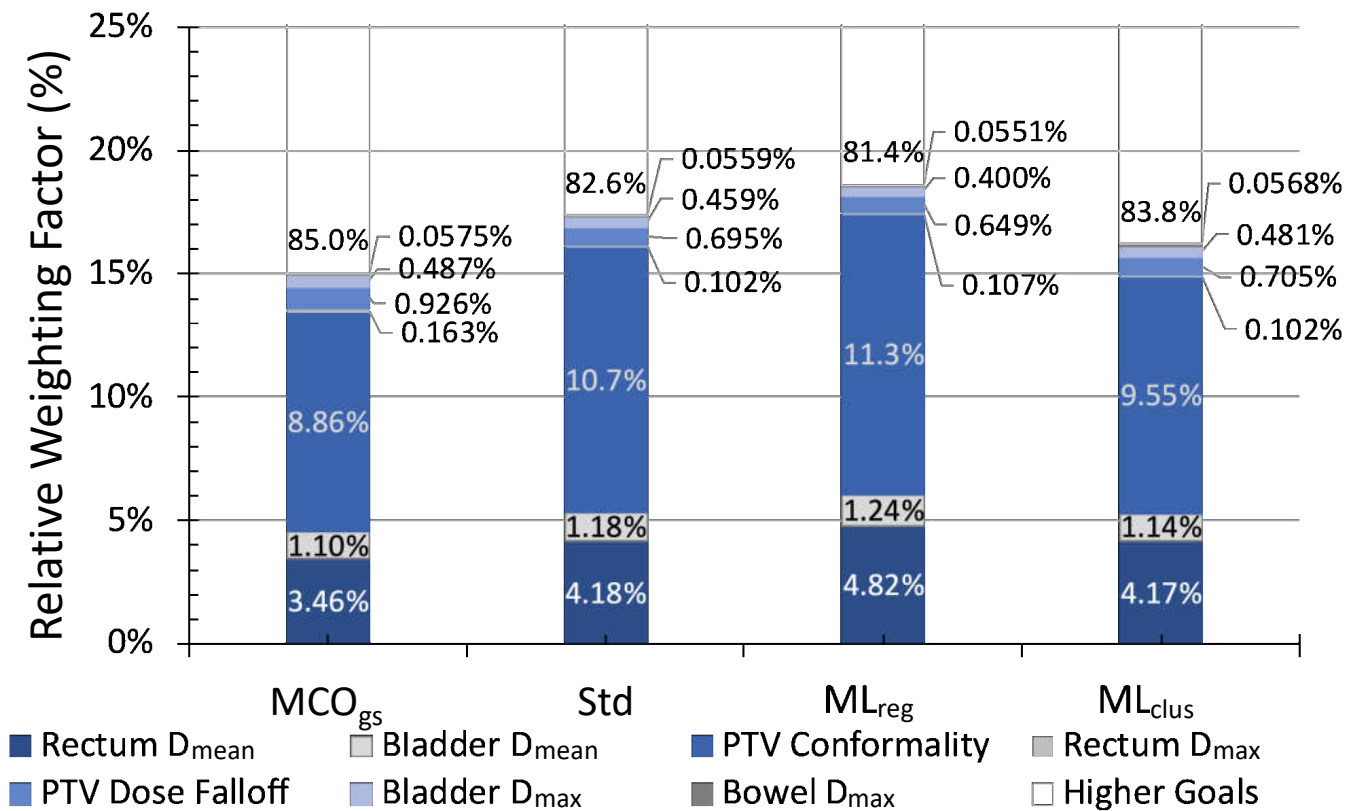

Supplement: s1 [file s1]
